# Supplementary material for: Novel synthesis of FAU-type zeolite membrane with high performanceElectronic supplementary information (ESI) available: Time dependence of the CO2 and N2 permeation. See http://www.rsc.org/suppdata/cc/b4/b405691d/
Source: Royal Society of Chemistry journal article supplement (doi:10.1039/b405691d), 2004-01-01
Supplement: b405691d.pdf [file b405691d.pdf]

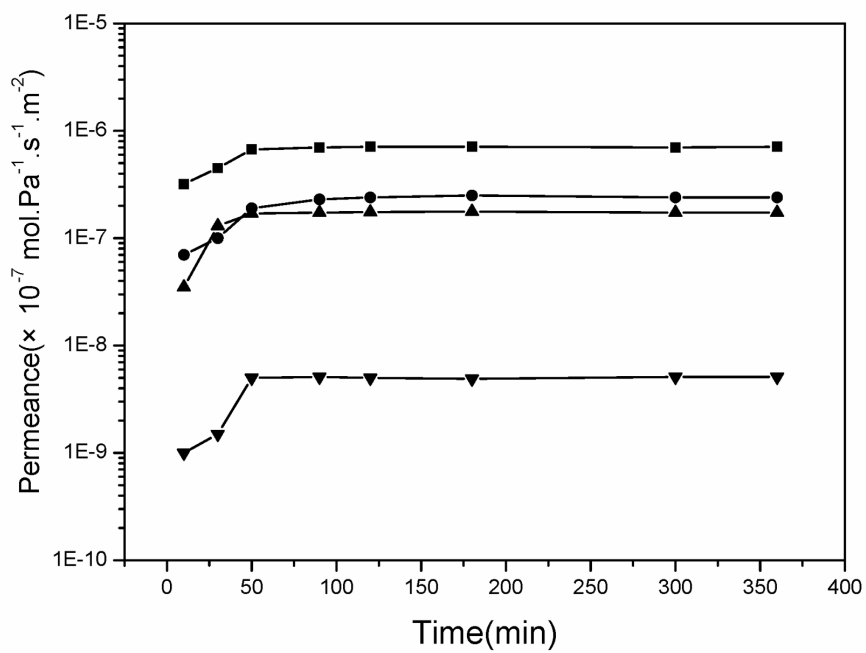

Figure 4 Time dependence of the CO<sub>2</sub> permeation (■, unseeded membrane; ●, seeded membrane) and N<sub>2</sub> permeation (▲, unseeded membrane; ▼, seeded membrane) at the dry temperature of 120°C.
